# Supplementary material
Source: PubMed Central journal article supplement (PMC7221860)
Supplement: jamapsychiatry-e200940-s003.pdf [file jamapsychiatry-e200940-s003.pdf]

## Data Sharing Statement

Axelsson. Effect of Internet vs Face-to-Face Cognitive Behavior Therapy for Health Anxiety. *JAMA Psychiatry*. Published May 13, 2020. 10.1001/jamapsychiatry.2020.0940

### Data

**Data available:** No

### Additional Information

**Explanation for why data not available:** Requests for additional information should be made to the first or last author. Due to Swedish and European Union data protection and privacy legislation, we generally do not share patient-level data. Due to administrative error, ClinicalTrials lists the Quality of Life Inventory (QOLI) as an outcome despite this never being used. The study protocol also lists the Obsessive Compulsive Inventory - Revised (OCI-R), the Yale-Brown Obsessive-Compulsive Inventory Scale (Y-BOCS), and the Peters et al. Delusions Inventory (PDI-21) as outcomes but these were never administered.
